# Supplementary material for: Ionothermal effects on low-dimensionality uranyl compounds using task specific ionic liquids
Source: Royal Society of Chemistry journal article supplement (doi:10.1039/c4ce00512k), 2014-01-01
Supplement: c4ce00512k1.pdf [file c4ce00512k1.pdf]

Supporting Information

**Ionothermal effects on low-dimensionality uranyl compounds using task specific ionic liquids.**

P. A. Smith<sup>a</sup> and P. C. Burns<sup>\*a,b</sup>

<sup>a</sup> *Department of Civil and Environmental Engineering and Earth Sciences, University of Notre Dame, Notre Dame, IN 46556, USA*

<sup>b</sup> *Department of Chemistry and Biochemistry, University of Notre Dame, Notre Dame, IN 46556, USA*

**Contents**

**Figure S1-S2:** UV-Vis-NIR spectra of compounds 1-2.

**Figure S3-S4:** IR spectra of compounds 1-2.

**Figure S5:** EDAX spectrum of compound 1.

**Figure S6:** EDAX spectrum of compound 2.

**Figure S7-9:** Figures of 1.

**Figure S10-15:** Figures of 2.

**Tables 1-4:** Full crystallographic parameters of compound 1.

**Tables 5-8:** Full crystallographic parameters of compound 2.

**Figure S1:** UV-vis-NIR spectrum of **1**.

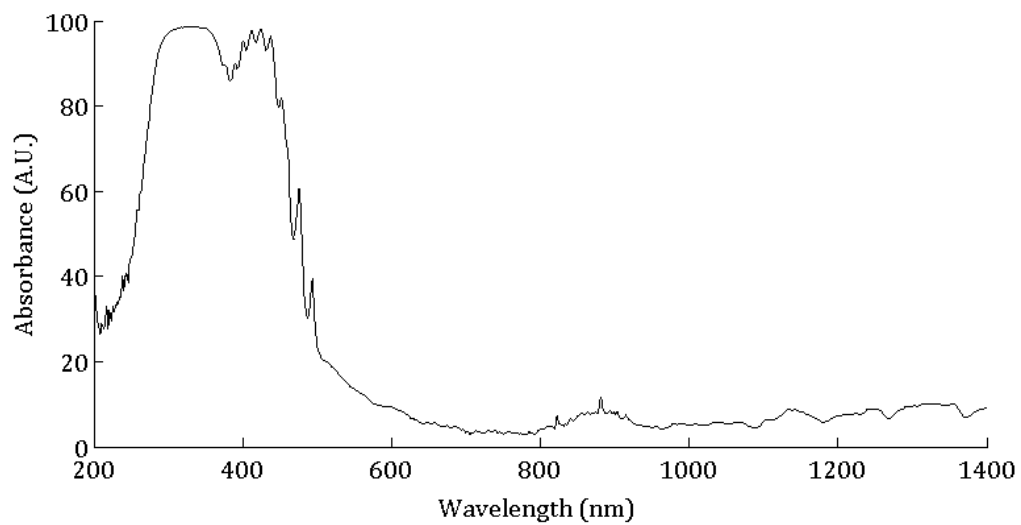

**Figure S2:** UV-vis-NIR spectrum of **2**.

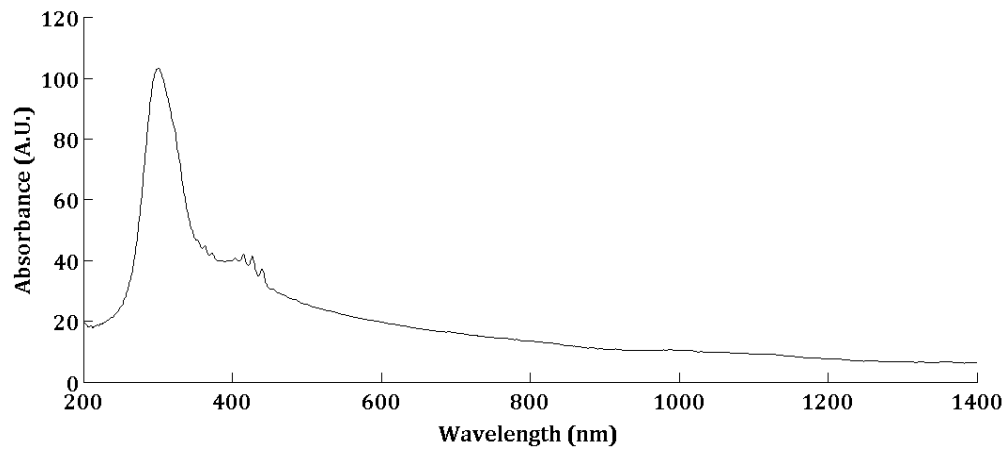

**Figure S3:** ATR-FTIR spectrum of **1**.

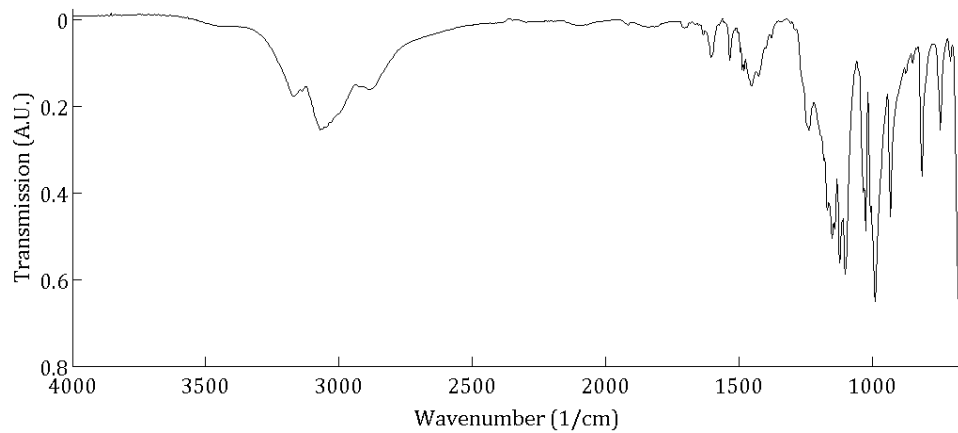

**Figure S4:** ATR-FTIR spectrum of **2**.

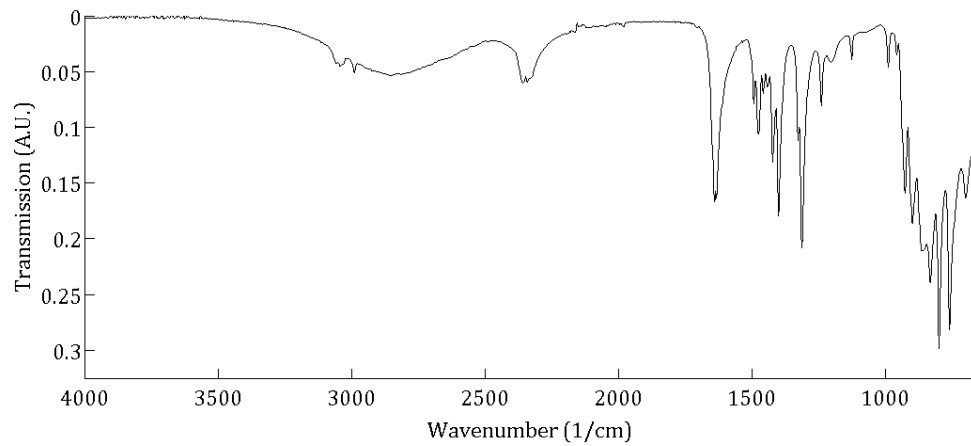

**Figure S5:** EDAX spectrum of **1** showing 83:17% ratio for S:U respectively, confirming the 4:1 ratio determined crystallographically.

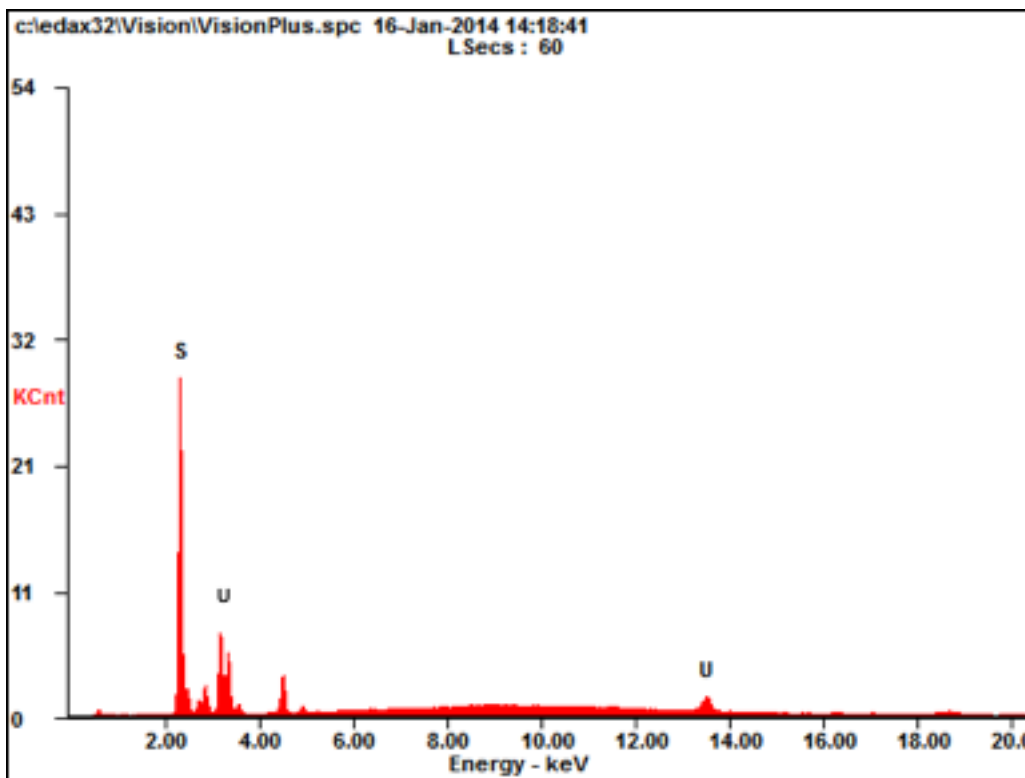

**Figure S6:** EDAX spectrum of **2** showing a 52:48% ratio for As:U respectively, confirming the crystallographically determined elemental ratio.

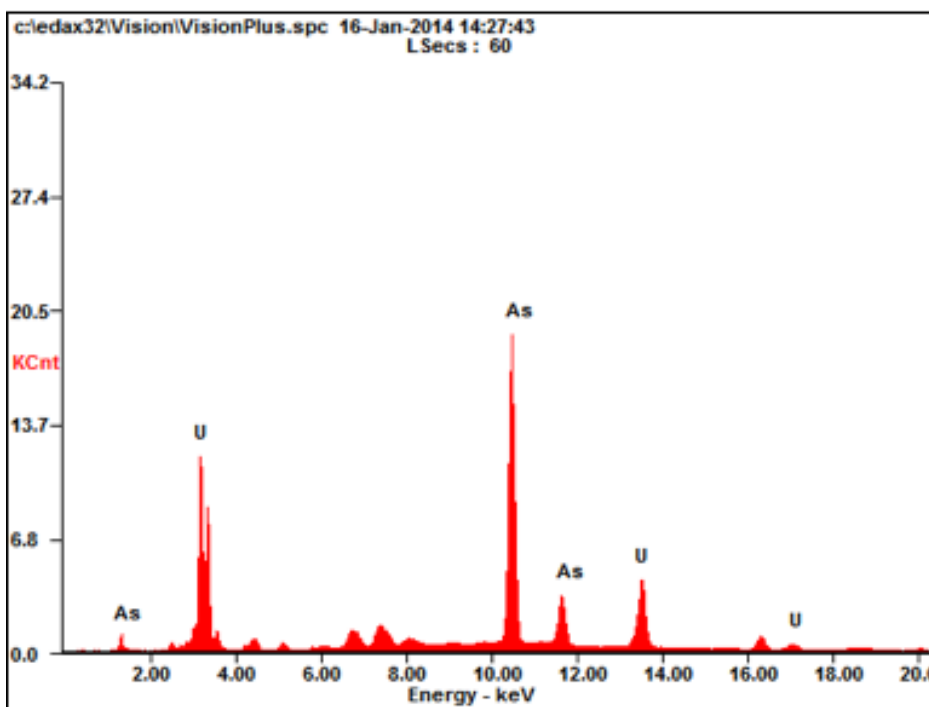

**Figure S7a:** Thermal Ellipsoid plot of the asymmetric unit of **1**, showing H-bond interactions between pyridinium and sulfonate moieties.

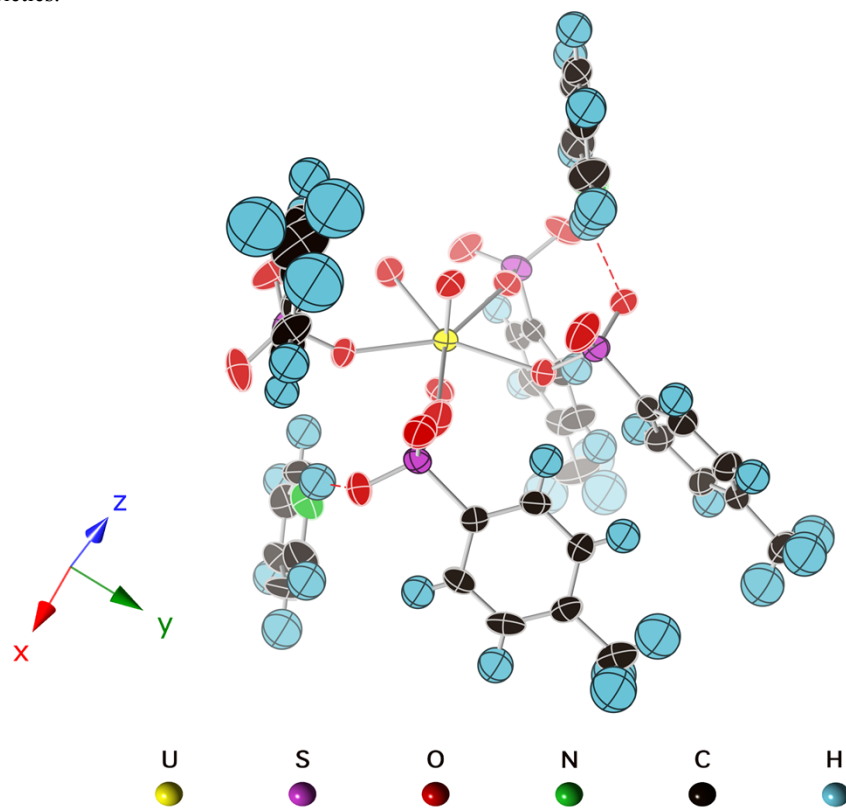

**Figure S7b:** Alternate Thermal Ellipsoid plot of the asymmetric unit of **1**, excluding those hydrogens not participating in H-bond interactions between the pyridinium and sulfonate moieties.

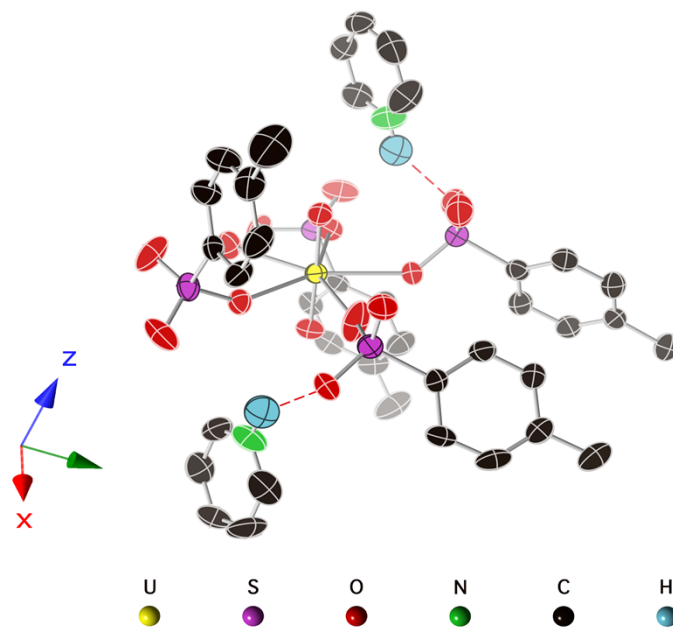

**Figure S8a,b:** Mixed Polyhedra - Ball and Stick plot of the asymmetric unit of **1**, showing p-touenesulfonate arrangement round the uranyl center; hydrogens are excluded for clarity.

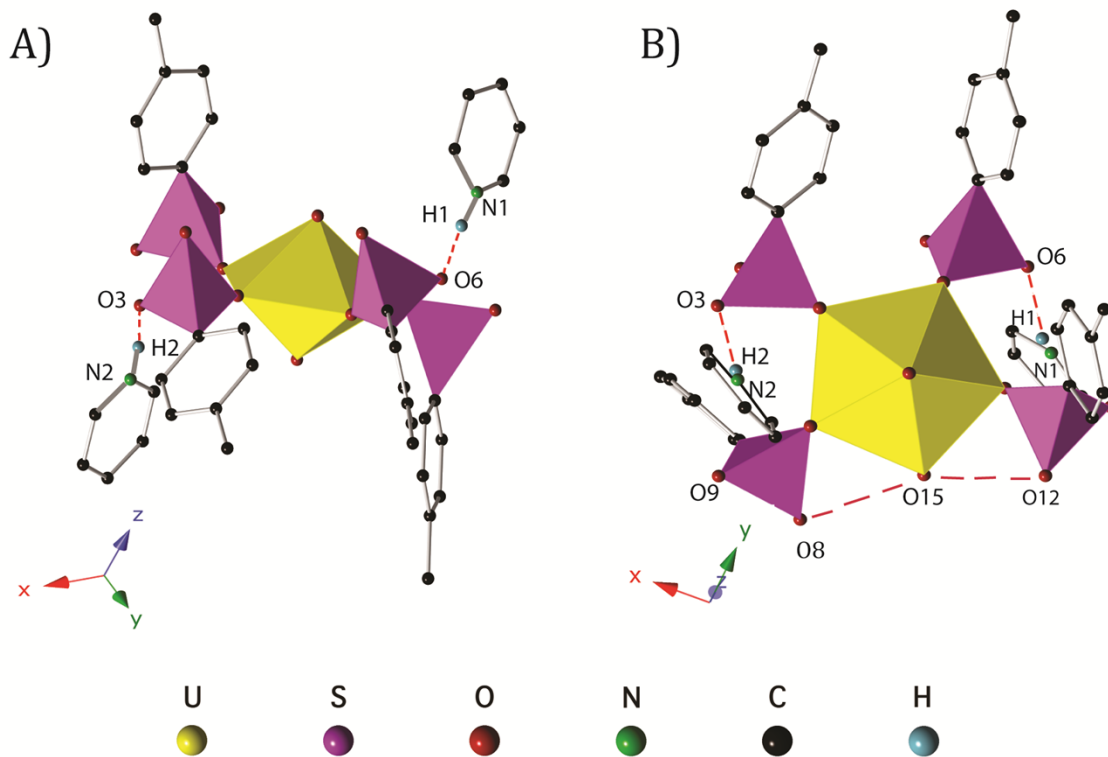

**Figure S9:** Mixed Ball and Stick - Polyhedra plot of **1** showing H-bonding interactions between monomers as extended along the y-axis.

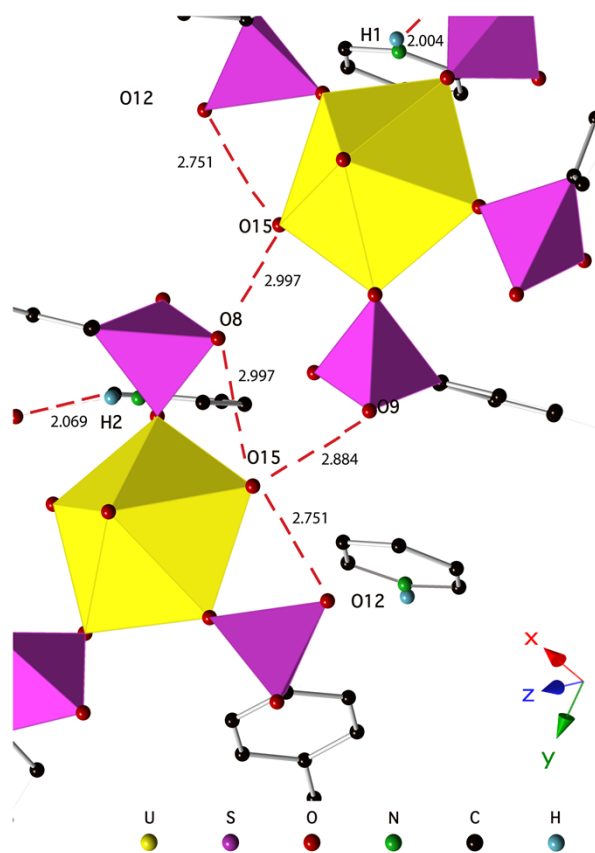

**Figure S10:** Thermal Ellipsoid plot of the asymmetric unit of **2**.

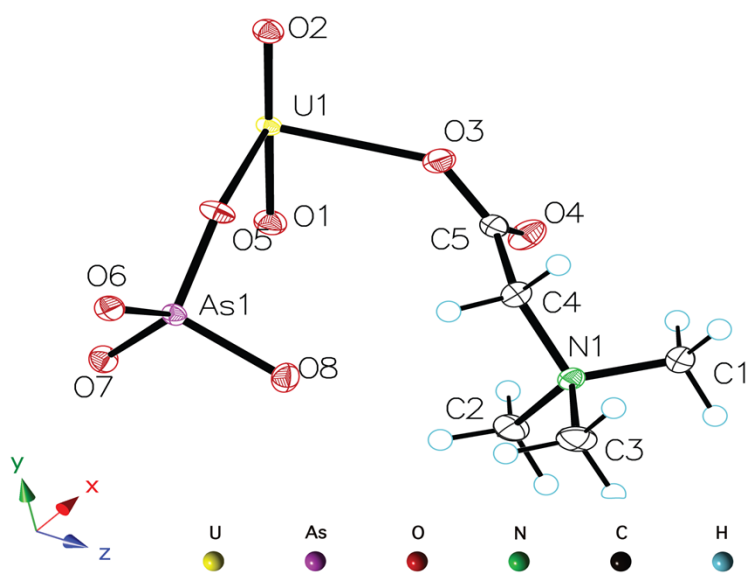

**Figure S11:** Polyhedra plot of **2** along the z-axis, emphasizing the 2D-zigzag chain topology.

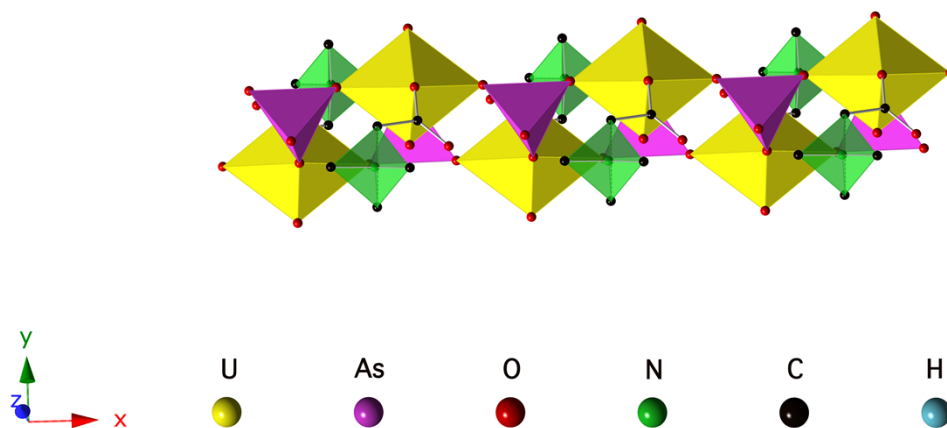

**Figure S12:** Mixed Ball and Stick - Polyhedra plot of **2**, emphasizing H-bond interaction between the betaine and arsenate moieties.

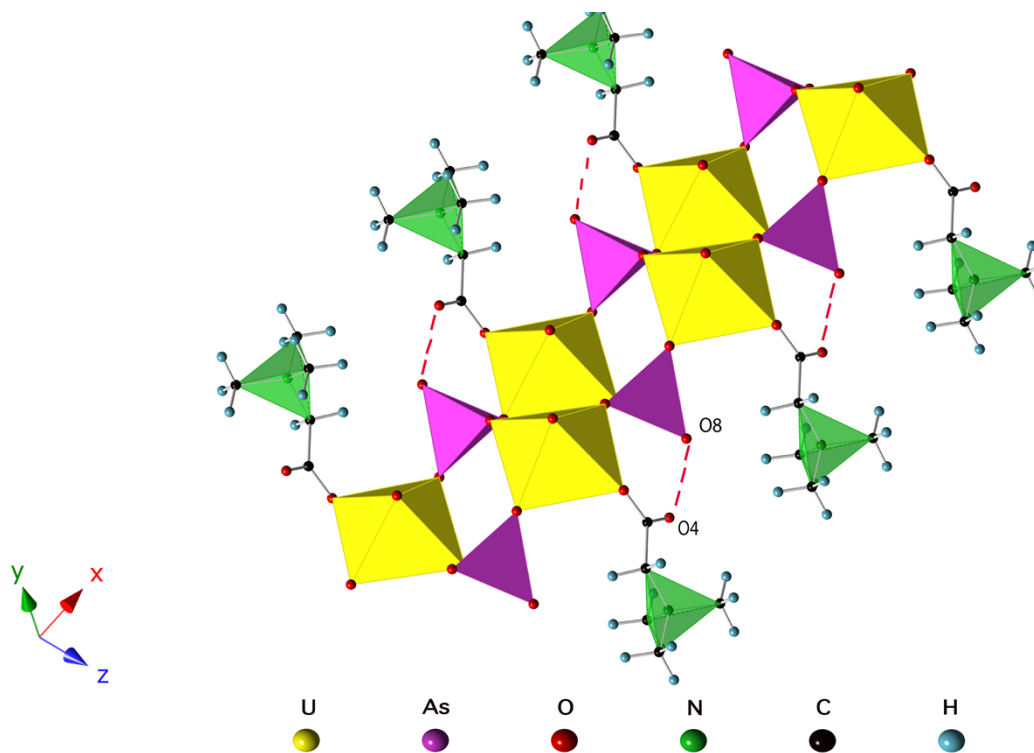



Figure S13: Thermal Ellipsoid plot of 2, emphasizing H-bond interaction between the betaine and arsenate moieties

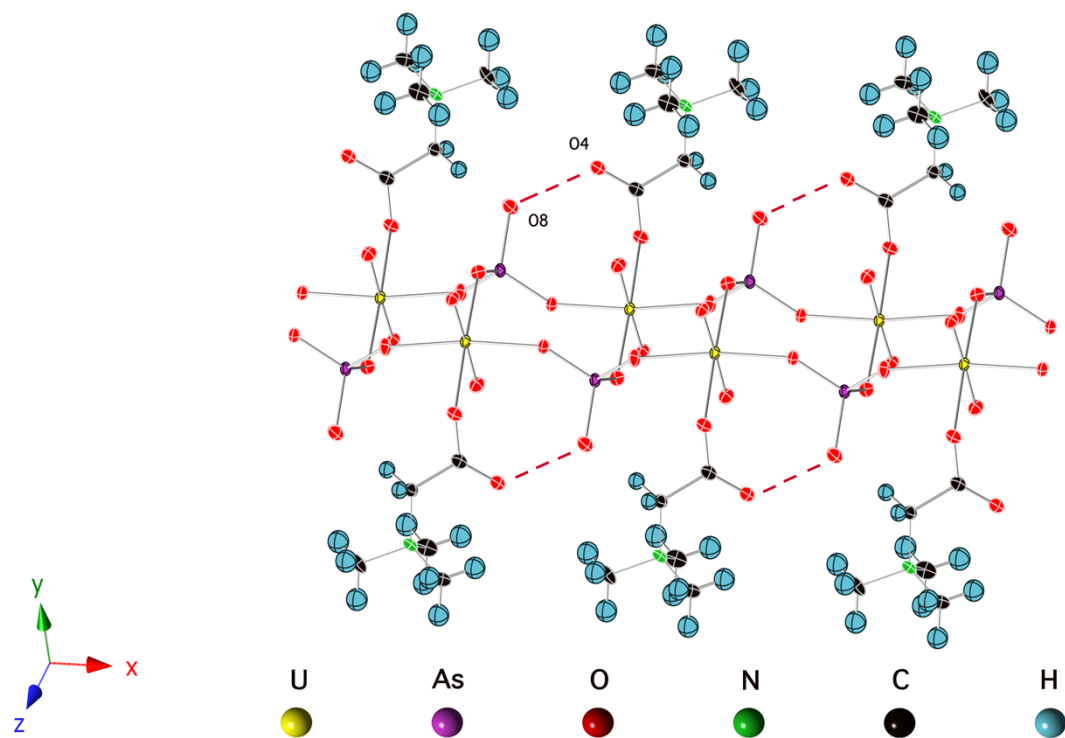

Figure S14: Alternate view of figure S13.

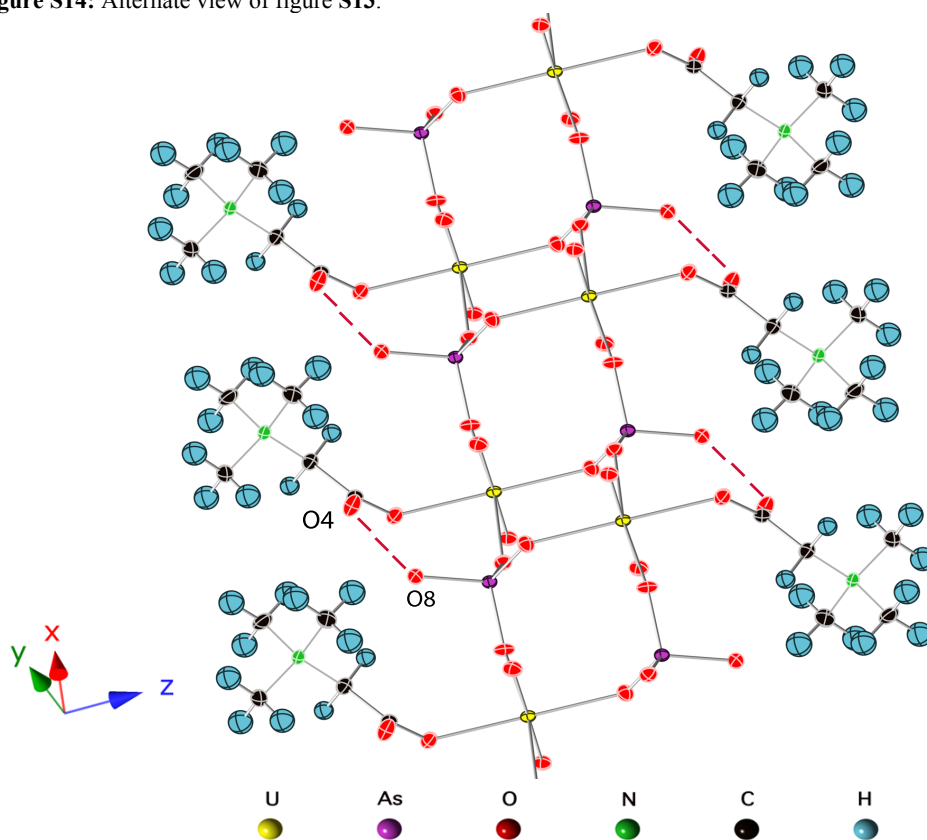

**Figure S15:** Packing diagram of **2** along the x-axis, using a mixed Ball and Stick - Polyhedra plot.

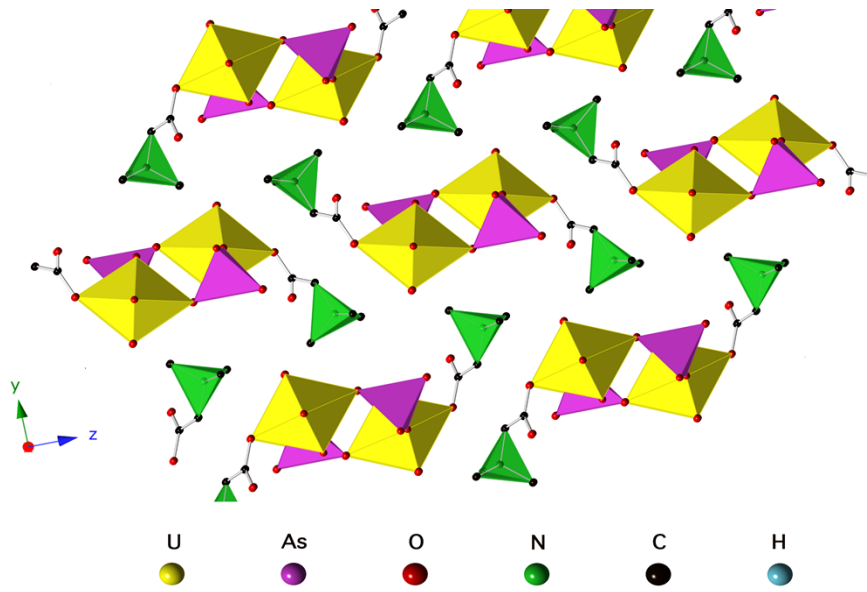

**Table 1.** Crystal data and structure refinement for **1***Crystal data*

CCDC: 985929

 $C_{38}H_{42}N_2O_{15}S_4U$  $M_r = 1133.00$ Monoclinic,  $P2_1/c$ 

Hall symbol: -P2yc

 $a = 12.3917(15) \text{ \AA}$  $b = 36.745(4) \text{ \AA}$  $c = 10.2457(12) \text{ \AA}$  $\beta = 112.1900(13)^\circ$  $V = 4319.7(9) \text{ \AA}^3$  $Z = 4$  $F(000) = 2232$  $D_x = 1.739 \text{ g cm}^{-3}$ Mo  $K\alpha$  radiation,  $\lambda = 0.71073 \text{ \AA}$ 

Cell parameters from 9165 reflections

 $\mu = 4.020 \text{ mm}^{-1}$  $T = 200 \text{ K}$ 

Rectangular prism, dark yellow

0.095 x 0.13 x 0.142 mm

*Data collection*

Bruker APEXII CCD area-detector diffractometer

Radiation source: microfocus sealed tube

Graphite monochromator

Resolution<sub>max</sub> = 0.80  $\text{\AA}$ 

Completeness = 100%

46962 Measured reflections

8837 Independent reflections

6990 reflections with  $I > 2\sigma(I)$  $R_{\text{int}} = 0.0715$  $\varphi$  and  $\pi$  scans

Absorption correction: multi-scan SADABS V2012 (Bruker, 2012) was used

 $wR2(\text{int}) = 0.2078$  before and 0.2042 after correction $\theta_{\text{min}} = 1.78$ ,  $\theta_{\text{max}} = 26.37^\circ$  $T_{\text{min}} = 0.599$ ,  $T_{\text{max}} = 0.701$  $h = -15 \rightarrow 15$  $k = -45 \rightarrow 45$  $l = -12 \rightarrow 12$ *Refinement*Refinement on  $F^2$ 

Least-squares matrix: full

 $R[F^2 > 2\sigma(F^2)] = 0.0328$  $wR(F^2) = 0.0734$  $S = 1.023$ 

8837 Reflections

545 Parameters

0 Restraints

Primary atom site location: intrinsic phasing

Secondary atom site location: difference Fourier map

Hydrogen site location: constrained

All H-atom treated by refinement constrained

 $w = 1/[\sigma^2(F_o^2) + (0.0231P)^2 + 3.0883P]$ where  $P = (F_o^2 + 2F_c^2)/3$  $(\Delta/\sigma)_{\text{max}} < 0.001$  $\Delta\rho_{\text{max}} = 0.507 \text{ e \AA}^{-3}$  $\Delta\rho_{\text{min}} = -0.632 \text{ e \AA}^{-3}$ 

Extinction correction: none

**Table 2.** Atomic coordinates and equivalent isotropic displacement parameters ( $\text{\AA}^2$ ) for **1**.  $U(\text{eq})$  is defined as one third of the trace of the orthogonalized  $U^{ij}$  tensor.

|     | X           | Y           | Z           | $U(\text{eq})$ |
|-----|-------------|-------------|-------------|----------------|
| U1  | 0.99664(2)  | 0.59887(2)  | 0.21632(2)  | 0.02797(6)     |
| S1  | 0.32109(9)  | 0.61799(3)  | 0.35716(12) | 0.0349(3)      |
| S2  | 0.99483(11) | 0.67672(3)  | 0.42449(13) | 0.0401(3)      |
| S3  | 0.13319(11) | 0.51049(3)  | 0.20266(12) | 0.0404(3)      |
| S4  | 0.68034(10) | 0.61781(4)  | 0.06321(13) | 0.0408(3)      |
| O4  | 0.0033(2)   | 0.65950(8)  | 0.2982(3)   | 0.0375(7)      |
| O13 | 0.9765(3)   | 0.61496(9)  | 0.0481(3)   | 0.0434(8)      |
| O3  | 0.3707(3)   | 0.59831(8)  | 0.2714(3)   | 0.0452(8)      |
| O10 | 0.7993(2)   | 0.61529(8)  | 0.1746(3)   | 0.0380(7)      |
| O2  | 0.3672(2)   | 0.60776(9)  | 0.5028(4)   | 0.0575(10)     |
| O7  | 0.0995(3)   | 0.54926(8)  | 0.1738(3)   | 0.0403(7)      |
| O14 | 0.0108(3)   | 0.58150(8)  | 0.3815(3)   | 0.0405(7)      |
| O6  | 0.8737(3)   | 0.67809(9)  | 0.4108(4)   | 0.0636(11)     |
| O11 | 0.5987(3)   | 0.63060(11) | 0.1218(4)   | 0.0589(10)     |
| O15 | 0.8584(3)   | 0.54863(9)  | 0.1005(4)   | 0.0506(9)      |
| O12 | 0.6471(3)   | 0.58370(9)  | 0.9873(4)   | 0.0562(10)     |
| O5  | 0.0728(4)   | 0.66071(9)  | 0.5520(4)   | 0.0662(11)     |
| O9  | 0.2117(3)   | 0.50088(10) | 0.1353(4)   | 0.0631(11)     |
| O8  | 0.0318(3)   | 0.48771(10) | 0.1686(4)   | 0.0702(12)     |
| O1  | 0.1932(3)   | 0.61668(10) | 0.2956(5)   | 0.0735(13)     |
| C32 | 0.6874(4)   | 0.65044(12) | 0.9409(4)   | 0.0349(10)     |
| C18 | 0.0375(4)   | 0.72219(12) | 0.4235(5)   | 0.0353(10)     |
| C21 | 0.0923(4)   | 0.79556(12) | 0.4195(5)   | 0.0409(11)     |
| C11 | 0.3539(4)   | 0.66479(12) | 0.3501(4)   | 0.0318(10)     |
| N1  | 0.7654(4)   | 0.62019(12) | 0.4831(5)   | 0.0574(12)     |
| C13 | 0.3379(4)   | 0.72573(13) | 0.4191(5)   | 0.0453(12)     |
| C37 | 0.6178(4)   | 0.64680(14) | 0.8001(5)   | 0.0424(12)     |
| C12 | 0.3129(4)   | 0.68933(13) | 0.4218(5)   | 0.0430(12)     |
| C16 | 0.4214(4)   | 0.67675(14) | 0.2759(5)   | 0.0437(12)     |
| C25 | 0.2119(4)   | 0.50703(11) | 0.3867(5)   | 0.0348(11)     |
| N2  | 0.2653(5)   | 0.57948(14) | 0.9829(4)   | 0.0577(13)     |
| C23 | 0.1102(5)   | 0.73894(14) | 0.5428(5)   | 0.0439(12)     |
| C33 | 0.7609(4)   | 0.68049(14) | 0.9862(6)   | 0.0461(13)     |
| C35 | 0.6923(5)   | 0.70288(17) | 0.7479(6)   | 0.0522(14)     |
| C36 | 0.6204(4)   | 0.67315(16) | 0.7063(6)   | 0.0491(13)     |
| C22 | 0.1370(5)   | 0.77539(14) | 0.5409(6)   | 0.0454(13)     |
| C2  | 0.6351(5)   | 0.58289(15) | 0.5298(7)   | 0.0504(14)     |
| C26 | 0.1607(5)   | 0.49202(15) | 0.4721(6)   | 0.0481(13)     |

|     |           |             |           |            |
|-----|-----------|-------------|-----------|------------|
| C1  | 0.6630(5) | 0.60407(16) | 0.4400(6) | 0.0549(15) |
| C34 | 0.7618(5) | 0.70598(16) | 0.8899(6) | 0.0568(15) |
| C28 | 0.3395(6) | 0.49842(15) | 0.6723(6) | 0.0588(16) |
| C3  | 0.7139(5) | 0.57784(15) | 0.6624(6) | 0.0518(14) |
| C15 | 0.4446(5) | 0.71353(16) | 0.2767(6) | 0.0503(14) |
| C20 | 0.0188(5) | 0.77873(15) | 0.2981(6) | 0.0469(13) |
| C14 | 0.4048(4) | 0.73841(14) | 0.3468(6) | 0.0444(13) |
| C19 | 0.9916(4) | 0.74212(14) | 0.2988(5) | 0.0441(13) |
| C30 | 0.3257(5) | 0.51826(14) | 0.4421(6) | 0.0464(13) |
| C10 | 0.1667(5) | 0.56727(15) | 0.8888(7) | 0.0541(15) |
| C24 | 0.1275(6) | 0.83482(14) | 0.4166(7) | 0.0648(18) |
| C29 | 0.3887(5) | 0.51434(15) | 0.5861(6) | 0.0573(16) |
| C9  | 0.1457(5) | 0.57084(17) | 0.7507(6) | 0.0586(16) |
| C27 | 0.2237(6) | 0.48767(17) | 0.6134(6) | 0.0602(16) |
| C6  | 0.3457(5) | 0.59509(18) | 0.9451(7) | 0.0641(18) |
| C17 | 0.4283(5) | 0.77858(16) | 0.3427(7) | 0.0672(18) |
| C4  | 0.8209(6) | 0.59467(17) | 0.7061(7) | 0.0629(17) |
| C8  | 0.2249(6) | 0.58666(18) | 0.7084(6) | 0.0603(16) |
| C5  | 0.8433(5) | 0.61648(19) | 0.6132(8) | 0.0721(19) |
| C7  | 0.3267(6) | 0.59870(19) | 0.8073(8) | 0.073(2)   |
| C38 | 0.6944(6) | 0.7320(2)   | 0.6442(7) | 0.085(2)   |
| C31 | 0.4103(7) | 0.4934(2)   | 0.8297(7) | 0.098(3)   |

**Table 3.** Bond lengths [Å] and angles [°] for **1**.

| Bond   | Length (Å) | Bonds      | Angle (°)  |
|--------|------------|------------|------------|
| U1-O13 | 1.748(3)   | O13-U1-O14 | 177.26(15) |
| U1-O14 | 1.755(3)   | O13-U1-O1  | 89.45(17)  |
| U1-O1  | 2.351(4)   | O14-U1-O1  | 93.14(17)  |
| U1-O7  | 2.357(3)   | O13-U1-O7  | 88.00(14)  |
| U1-O4  | 2.371(3)   | O14-U1-O7  | 91.90(14)  |
| U1-O10 | 2.396(3)   | O1-U1-O7   | 73.58(13)  |
| U1-O15 | 2.493(3)   | O13-U1-O4  | 90.22(14)  |
| S1-O2  | 1.432(4)   | O14-U1-O4  | 91.33(13)  |
| S1-O3  | 1.442(4)   | O1-U1-O4   | 73.93(12)  |
| S1-O1  | 1.469(4)   | O7-U1-O4   | 147.48(11) |
| S1-C11 | 1.775(5)   | O13-U1-O10 | 89.00(14)  |
| S2-O5  | 1.426(4)   | O14-U1-O10 | 89.26(14)  |
| S2-O6  | 1.455(4)   | O1-U1-O10  | 147.48(14) |
| S2-O4  | 1.480(3)   | O7-U1-O10  | 138.46(11) |
| S2-C18 | 1.758(5)   | O4-U1-O10  | 73.93(11)  |

|         |          |            |            |
|---------|----------|------------|------------|
| S3-O9   | 1.434(4) | O13-U1-O15 | 87.95(15)  |
| S3-O8   | 1.439(4) | O14-U1-O15 | 89.44(14)  |
| S3-O7   | 1.483(3) | O1-U1-O15  | 143.76(13) |
| S3-C25  | 1.770(5) | O7-U1-O15  | 70.20(11)  |
| S4-O11  | 1.437(4) | O4-U1-O15  | 142.19(11) |
| S4-O12  | 1.450(4) | O10-U1-O15 | 68.29(11)  |
| S4-O10  | 1.487(3) | O13-U1-O14 | 177.35(15) |
| S4-C32  | 1.760(5) | O13-U1-O1  | 89.34(17)  |
| C32-C37 | 1.380(6) | O14-U1-O1  | 93.21(17)  |
| C32-C33 | 1.391(7) | O13-U1-O7  | 88.06(14)  |
| C18-C19 | 1.369(7) | O14-U1-O7  | 91.98(14)  |
| C18-C23 | 1.382(7) | O1-U1-O7   | 73.64(13)  |
| C21-C22 | 1.373(7) | O13-U1-O4  | 90.10(14)  |
| C21-C20 | 1.377(7) | O14-U1-O4  | 91.29(13)  |
| C21-C24 | 1.515(7) | O1-U1-O4   | 73.89(12)  |
| C11-C12 | 1.376(7) | O7-U1-O4   | 147.50(11) |
| C11-C16 | 1.396(7) | O13-U1-O10 | 88.90(14)  |
| N1-C1   | 1.320(7) | O14-U1-O10 | 89.32(14)  |
| N1-C5   | 1.325(8) | O1-U1-O10  | 147.69(14) |
| C13-C12 | 1.375(7) | O7-U1-O10  | 138.51(11) |
| C13-C14 | 1.388(7) | O4-U1-O10  | 73.85(11)  |
| C37-C36 | 1.370(7) | O13-U1-O15 | 88.04(15)  |
| C16-C15 | 1.378(7) | O14-U1-O15 | 89.48(14)  |
| C25-C30 | 1.371(7) | O1-U1-O15  | 143.82(13) |
| C25-C26 | 1.375(7) | O7-U1-O15  | 70.21(11)  |
| N2-C10  | 1.319(7) | O4-U1-O15  | 142.16(11) |
| N2-C6   | 1.323(8) | O10-U1-O15 | 68.33(11)  |
| C23-C22 | 1.381(7) | O2-S1-O1   | 112.3(3)   |
| C33-C34 | 1.368(7) | O2-S1-C11  | 106.8(2)   |
| C35-C36 | 1.377(8) | O1-S1-C11  | 104.0(2)   |
| C35-C34 | 1.387(7) | O2-S1-O3   | 114.4(2)   |
| C35-C38 | 1.515(8) | O3-S1-O1   | 111.2(2)   |
| C2-C1   | 1.348(8) | O3-S1-C11  | 107.7(2)   |
| C2-C3   | 1.353(8) | O5-S2-O4   | 112.2(2)   |
| C26-C27 | 1.372(8) | O5-S2-C18  | 108.0(2)   |
| C28-C29 | 1.378(8) | O4-S2-C18  | 105.31(2)  |
| C28-C27 | 1.387(8) | O5-S2-O6   | 114.8(3)   |
| C28-C31 | 1.524(8) | O6-S2-O4   | 110.0(2)   |
| C3-C4   | 1.375(8) | O6-S2-C18  | 105.9(2)   |
| C15-C14 | 1.368(8) | O9-S3-O7   | 109.4(2)   |
| C20-C19 | 1.386(7) | O9-S3-C25  | 107.1(2)   |
| C14-C17 | 1.507(7) | O7-S3-C25  | 106.38(2)  |
| C30-C29 | 1.389(7) | O9-S3-O8   | 115.4(3)   |

|        |          |             |            |
|--------|----------|-------------|------------|
| C10-C9 | 1.342(8) | O8-S3-O7    | 110.9(2)   |
| C9-C8  | 1.345(8) | O8-S3-C25   | 107.2(2)   |
| C6-C7  | 1.354(9) | O11-S4-O12  | 113.9(2)   |
| C4-C5  | 1.352(9) | O11-S4-O10  | 110.5(2)   |
| C8-C7  | 1.361(9) | O12-S4-O10  | 110.8(2)   |
|        |          | O11-S4-C32  | 107.9(2)   |
|        |          | O12-S4-C32  | 106.7(2)   |
|        |          | O10-S4-C32  | 106.7(2)   |
|        |          | S1-O1-U1    | 165.2(2)   |
|        |          | S2-O4-U1    | 134.97(18) |
|        |          | S3-O7-U1    | 146.87(19) |
|        |          | S4-O10-U1   | 143.30(18) |
|        |          | C1-N1-C5    | 122.0(5)   |
|        |          | C10-N2-C6   | 121.6(5)   |
|        |          | C37-C32-S4  | 119.9(4)   |
|        |          | C19-C18-C23 | 119.4(4)   |
|        |          | C23-C18-S2  | 120.0(4)   |
|        |          | C22-C21-C24 | 120.9(5)   |
|        |          | C12-C11-C16 | 120.2(4)   |
|        |          | C16-C11-S1  | 121.4(4)   |
|        |          | C12-C13-C14 | 121.5(5)   |
|        |          | C11-C12-C13 | 119.7(5)   |
|        |          | C30-C25-C26 | 120.5(5)   |
|        |          | C26-C25-S3  | 120.3(4)   |
|        |          | C18-C23-C22 | 119.8(5)   |
|        |          | C36-C35-C34 | 117.7(5)   |
|        |          | C34-C35-C38 | 120.7(6)   |
|        |          | C21-C22-C23 | 121.3(5)   |
|        |          | C27-C26-C25 | 120.2(5)   |
|        |          | C33-C34-C35 | 121.9(6)   |
|        |          | C29-C28-C31 | 120.7(6)   |
|        |          | C2-C3-C4    | 120.5(6)   |
|        |          | C21-C20-C19 | 120.8(5)   |
|        |          | C15-C14-C17 | 122.2(5)   |
|        |          | C18-C19-C20 | 120.3(5)   |
|        |          | N2-C10-C9   | 119.8(5)   |
|        |          | C8-C9-C10   | 120.5(6)   |
|        |          | N2-C6-C7    | 119.7(6)   |
|        |          | C9-C8-C7    | 119.0(6)   |
|        |          | C6-C7-C8    | 119.5(6)   |
|        |          | C37-C32-C33 | 119.9(4)   |
|        |          | C33-C32-S4  | 120.2(3)   |
|        |          | C19-C18-S2  | 120.4(4)   |

|             |          |
|-------------|----------|
| C22-C21-C20 | 118.5(4) |
| C20-C21-C24 | 120.6(5) |
| C12-C11-S1  | 118.4(4) |
| C36-C37-C32 | 119.7(5) |
| C15-C16-C11 | 118.2(5) |
| C30-C25-S3  | 119.2(4) |
| C34-C33-C32 | 119.1(5) |
| C36-C35-C38 | 121.5(5) |
| C37-C36-C35 | 121.6(5) |
| C1-C2-C3    | 119.3(6) |
| N1-C1-C2    | 119.9(6) |
| C29-C28-C27 | 118.6(5) |
| C27-C28-C31 | 120.8(6) |
| C14-C15-C16 | 122.9(5) |
| C15-C14-C13 | 117.5(5) |
| C13-C14-C17 | 120.3(5) |
| C25-C30-C29 | 119.1(5) |
| C28-C29-C30 | 121.2(5) |
| C26-C27-C28 | 120.5(6) |
| C5-C4-C3    | 117.9(6) |
| N1-C5-C4    | 120.4(6) |

Symmetry codes:

(I) x, -y+1/2, z-1/2; (II) x, -y+1/2, z+1/2

**Table 4.** Anisotropic displacement parameters ( $\text{\AA}^2$ ) for **1**. The anisotropic displacement factor exponent takes the form:  $-2\pi^2 [h^2 a^{*2} U^{11} + \dots + 2 h k a^* b^* U^{12}]$

|     | $U_{11}$   | $U_{22}$   | $U_{33}$   | $U_{23}$    | $U_{13}$   | $U_{12}$     |
|-----|------------|------------|------------|-------------|------------|--------------|
| U1  | 0.02546(9) | 0.03191(9) | 0.02485(9) | -0.00024(7) | 0.00757(6) | -0.00266(7)  |
| S1  | 0.0269(6)  | 0.0400(7)  | 0.0375(7)  | -0.0044(5)  | 0.0118(5)  | -0.0035(5)   |
| S2  | 0.0480(8)  | 0.0344(7)  | 0.0421(7)  | -0.0040(6)  | 0.0219(6)  | -0.0077(6)   |
| S3  | 0.0493(8)  | 0.0330(7)  | 0.0309(7)  | -0.0019(5)  | 0.0061(6)  | 0.0016(6)    |
| S4  | 0.0251(6)  | 0.0556(8)  | 0.0386(7)  | -0.0008(6)  | 0.0087(5)  | -0.0056(6)   |
| O4  | 0.0401(18) | 0.0357(18) | 0.0369(18) | -0.0077(14) | 0.0148(16) | -0.00412(15) |
| O13 | 0.046(2)   | 0.0510(19) | 0.0369(19) | 0.0047(17)  | 0.0200(17) | 0.0028(17)   |
| O3  | 0.049(2)   | 0.0484(19) | 0.0390(19) | -0.0082(16) | 0.0176(18) | 0.0056(17)   |
| O10 | 0.0250(16) | 0.0491(19) | 0.0364(19) | -0.0040(16) | 0.0077(14) | -0.0040(15)  |
| O2  | 0.090(3)   | 0.047(2)   | 0.042(2)   | 0.0050(18)  | 0.033(2)   | -0.0017(19)  |
| O7  | 0.0474(19) | 0.0318(17) | 0.0395(18) | 0.0026(15)  | 0.0140(17) | 0.0055(15)   |
| O14 | 0.052(2)   | 0.0381(19) | 0.0265(18) | 0.0039(15)  | 0.0096(16) | -0.0037(17)  |
| O6  | 0.060(3)   | 0.051(2)   | 0.103(3)   | -0.014(2)   | 0.057(3)   | -0.0190(19)  |



|     |            |          |          |             |             |             |
|-----|------------|----------|----------|-------------|-------------|-------------|
| O11 | 0.0298(18) | 0.097(3) | 0.056(3) | 0.011(2)    | 0.0225(19)  | 0.0062(18)  |
| O15 | 0.044(2)   | 0.049(2) | 0.056(2) | -0.0194(18) | 0.0161(18)  | -0.0111(17) |
| O12 | 0.047(2)   | 0.054(2) | 0.049(2) | -0.0001(19) | -0.0029(19) | -0.0168(19) |
| O5  | 0.106(3)   | 0.042(2) | 0.040(2) | 0.0019(18)  | 0.016(2)    | -0.006(2)   |
| O9  | 0.081(3)   | 0.070(3) | 0.038(2) | 0.004(2)    | 0.022(2)    | 0.034(2)    |
| O8  | 0.074(3)   | 0.054(3) | 0.051(2) | 0.0072(18)  | -0.013(2)   | -0.032(2)   |
| O1  | 0.0273(19) | 0.049(2) | 0.135(4) | -0.023(3)   | 0.020(2)    | -0.0097(17) |
| C32 | 0.031(3)   | 0.043(3) | 0.032(2) | -0.002(2)   | 0.013(2)    | 0.005(2)    |
| C18 | 0.036(3)   | 0.037(2) | 0.037(3) | -0.004(2)   | 0.018(2)    | -0.001(2)   |
| C21 | 0.046(3)   | 0.036(3) | 0.049(3) | -0.007(2)   | 0.028(3)    | -0.003(2)   |
| C11 | 0.026(2)   | 0.038(2) | 0.026(2) | -0.0022(19) | 0.0025(19)  | -0.0038(19) |
| N1  | 0.058(3)   | 0.059(3) | 0.066(3) | 0.022(3)    | 0.034(3)    | 0.006(2)    |
| C13 | 0.048(3)   | 0.039(3) | 0.052(3) | -0.010(3)   | 0.022(3)    | -0.008(2)   |
| C37 | 0.029(3)   | 0.056(3) | 0.037(3) | -0.009(2)   | 0.007(2)    | 0.001(2)    |
| C12 | 0.042(3)   | 0.049(3) | 0.042(3) | -0.002(2)   | 0.021(2)    | -0.010(2)   |
| C16 | 0.042(3)   | 0.059(3) | 0.035(3) | 0.001(2)    | 0.020(2)    | -0.001(3)   |
| C25 | 0.041(3)   | 0.029(2) | 0.029(2) | -0.0014(19) | 0.007(2)    | 0.0023(19)  |
| N2  | 0.067(3)   | 0.074(4) | 0.029(2) | 0.006(2)    | 0.015(2)    | 0.017(3)    |
| C23 | 0.052(3)   | 0.046(3) | 0.032(3) | 0.004(2)    | 0.014(2)    | -0.001(2)   |
| C33 | 0.036(3)   | 0.054(3) | 0.039(3) | 0.000(2)    | 0.003(2)    | -0.005(2)   |
| C35 | 0.037(3)   | 0.068(4) | 0.046(3) | 0.014(3)    | 0.010(3)    | 0.007(3)    |
| C36 | 0.034(3)   | 0.073(4) | 0.035(3) | 0.002(3)    | 0.005(2)    | 0.012(3)    |
| C22 | 0.048(3)   | 0.044(3) | 0.041(3) | -0.012(2)   | 0.012(2)    | -0.014(2)   |
| C2  | 0.041(3)   | 0.046(3) | 0.065(4) | 0.002(3)    | 0.022(3)    | 0.000(3)    |
| C26 | 0.043(3)   | 0.061(4) | 0.040(3) | -0.010(3)   | 0.016(2)    | -0.010(3)   |
| C1  | 0.049(3)   | 0.067(4) | 0.039(3) | 0.006(3)    | 0.008(3)    | 0.005(3)    |
| C34 | 0.052(4)   | 0.058(4) | 0.053(3) | 0.008(3)    | 0.011(3)    | -0.013(3)   |
| C28 | 0.079(4)   | 0.047(3) | 0.035(3) | 0.009(3)    | 0.004(3)    | -0.002(3)   |
| C3  | 0.061(4)   | 0.044(3) | 0.060(4) | 0.017(3)    | 0.034(3)    | 0.014(3)    |
| C15 | 0.039(3)   | 0.064(3) | 0.053(4) | 0.013(3)    | 0.019(3)    | -0.013(3)   |
| C20 | 0.063(4)   | 0.039(3) | 0.043(3) | 0.006(2)    | 0.024(3)    | 0.001(3)    |
| C14 | 0.039(3)   | 0.041(3) | 0.051(3) | 0.002(2)    | 0.014(2)    | -0.008(2)   |
| C19 | 0.049(3)   | 0.043(3) | 0.037(3) | -0.007(2)   | 0.013(2)    | -0.011(2)   |
| C30 | 0.050(3)   | 0.043(3) | 0.038(3) | 0.005(2)    | 0.008(2)    | -0.013(3)   |
| C10 | 0.054(4)   | 0.054(4) | 0.062(4) | 0.003(3)    | 0.030(3)    | -0.012(3)   |
| C24 | 0.096(5)   | 0.036(3) | 0.073(4) | -0.012(3)   | 0.046(4)    | -0.018(3)   |
| C29 | 0.049(3)   | 0.056(4) | 0.049(3) | 0.005(3)    | -0.002(3)   | -0.014(3)   |
| C9  | 0.051(3)   | 0.066(4) | 0.049(3) | -0.015(3)   | 0.006(3)    | -0.008(3)   |
| C27 | 0.083(4)   | 0.068(4) | 0.037(3) | 0.002(3)    | 0.029(3)    | -0.006(3)   |
| C6  | 0.037(3)   | 0.090(5) | 0.055(4) | -0.024(3)   | 0.005(3)    | -0.007(3)   |
| C17 | 0.066(4)   | 0.054(3) | 0.082(5) | 0.007(3)    | 0.031(4)    | -0.017(3)   |
| C4  | 0.059(4)   | 0.073(4) | 0.040(3) | -0.002(3)   | -0.002(3)   | 0.016(3)    |
| C8  | 0.069(4)   | 0.080(4) | 0.036(3) | 0.002(3)    | 0.025(3)    | 0.004(3)    |

|     |          |          |          |          |           |           |
|-----|----------|----------|----------|----------|-----------|-----------|
| C5  | 0.041(3) | 0.072(5) | 0.091(5) | 0.006(4) | 0.011(3)  | -0.011(3) |
| C7  | 0.060(4) | 0.100(6) | 0.077(5) | 0.006(4) | 0.043(4)  | -0.023(4) |
| C38 | 0.066(5) | 0.099(6) | 0.067(5) | 0.040(4) | 0.002(4)  | -0.009(4) |
| C31 | 0.127(7) | 0.092(6) | 0.038(4) | 0.015(4) | -0.010(4) | -0.026(5) |

---

**Table 5.** Crystal data and structure refinement for **2***Crystal data*

CCDC: 985928

AsC<sub>5</sub>H<sub>12</sub>NO<sub>8</sub>UM<sub>r</sub> = 521.11Monoclinic, *P*2<sub>1</sub>/*c*Hall symbol: -*P*2yc*a* = 7.167(2) Å*b* = 14.704(3) Å*c* = 11.157(3) Å $\beta$  = 96.747(4)°*V* = 1167.6(4) Å<sup>3</sup>*Z* = 4

F(000) = 948

D<sub>x</sub> = 2.993 g cm<sup>-3</sup>Mo K $\alpha$  radiation,  $\lambda$  = 0.71073 Å

Cell parameters from 105 reflections

 $\mu$  = 16.740 mm<sup>-1</sup>

T = 125.0K

Rectangular prisms, greenish yellow

0.065 x 0.010 x 0.003 mm

*Data collection*

Bruker APEXII CCD area-detector diffractometer

Radiation source: microfocus sealed tube

Graphite monochromator

Resolution<sub>max</sub> = 0.80 Å

Completeness = 100.0%

11720 Measured reflections

2385 Independent reflections

2204 reflections with  $I > 2\sigma(I)$ R<sub>int</sub> = 0.0276 $\phi$  and  $\pi$  scans

Absorption correction: multi-scan SADABS V2012 (Bruker, 2012) was used

wR2(int) = 0.1359 before and 0.0369 after correction

 $\theta_{\min}$  = 2.30,  $\theta_{\max}$  = 26.37°T<sub>min</sub> = 0.4701, T<sub>max</sub> = 0.7458*h* = -8 → 8*k* = -18 → 18*l* = -13 → 13*Refinement*Refinement on F<sup>2</sup>

Least-squares matrix: full

R[F<sup>2</sup> > 2 $\sigma$ (F<sup>2</sup>)] = 0.0166wR(F<sup>2</sup>) = 0.0381

S = 1.080

2385 Reflections

148 Parameters

0 Restraints

Primary atom site location: intrinsic phasing

Secondary atom site location: difference Fourier map

Hydrogen site location: constrained

All H-atom treated by refinement constrained

w = 1/[ $\sigma^2(F_o^2) + (0.0135P)^2 + 3.57P$ ]where P = (F<sub>o</sub><sup>2</sup> + 2F<sub>c</sub><sup>2</sup>)/3 $(\Delta/\sigma)_{\max} < 0.001$  $\Delta\rho_{\max} = 0.855 \text{ e } \text{Å}^{-3}$  $\Delta\rho_{\min} = -0.726 \text{ e } \text{Å}^{-3}$ 

Extinction correction: none

**Table 6.** Atomic coordinates and equivalent isotropic displacement parameters ( $\text{\AA}^2$ ) for **2**.  $U(\text{eq})$  is defined as one third of the trace of the orthogonalized  $U^{ij}$  tensor.

|     | X          | Y           | Z          | $U(\text{eq})$ |
|-----|------------|-------------|------------|----------------|
| U1  | 0.22260(2) | 0.05023(2)  | 0.84301(2) | 0.00954(5)     |
| As1 | 0.72008(5) | 0.98117(3)  | 0.83527(3) | 0.01061(8)     |
| O1  | 0.2342(4)  | 0.93187(18) | 0.8789(2)  | 0.0167(6)      |
| O2  | 0.2159(3)  | 0.16788(18) | 0.8048(2)  | 0.0147(6)      |
| O3  | 0.1605(4)  | 0.00969(19) | 0.6402(2)  | 0.0171(6)      |
| O4  | 0.0147(4)  | 0.8752(2)   | 0.6131(3)  | 0.0215(6)      |
| O5  | 0.5295(4)  | 0.04719(18) | 0.8147(2)  | 0.0158(6)      |
| O6  | 0.9078(4)  | 0.04918(18) | 0.8396(2)  | 0.0146(6)      |
| O7  | 0.7232(4)  | 0.91431(19) | 0.9565(2)  | 0.0156(6)      |
| O8  | 0.7076(4)  | 0.9135(2)   | 0.7087(2)  | 0.0191(6)      |
| N1  | 0.3069(4)  | 0.8084(2)   | 0.4787(3)  | 0.0138(7)      |
| C1  | 0.1384(6)  | 0.7874(3)   | 0.3900(4)  | 0.0212(9)      |
| C2  | 0.3207(6)  | 0.7418(3)   | 0.5816(4)  | 0.0231(9)      |
| C3  | 0.4820(6)  | 0.7986(3)   | 0.4172(4)  | 0.0229(9)      |
| C4  | 0.3006(5)  | 0.9045(3)   | 0.5239(3)  | 0.0156(8)      |
| C5  | 0.1427(5)  | 0.9289(3)   | 0.5980(3)  | 0.0157(8)      |

**Table 7.** Bond lengths [ $\text{\AA}$ ] and angles [ $^\circ$ ] for **2**.

| Bond   | Length ( $\text{\AA}$ ) | Bonds     | Angle ( $^\circ$ ) |
|--------|-------------------------|-----------|--------------------|
| U1-O1  | 1.786(3)                | O1-U1-O3  | 88.11(11)          |
| U1-O2  | 1.781(3)                | O1-U1-O5  | 89.52(11)          |
| U1-O3  | 2.331(3)                | O1-U1-O6  | 90.98(11)          |
| U1-O5  | 2.259(3)                | O1-U1-O7  | 90.27(11)          |
| U1-O6  | 2.252(3)                | O2-U1-O1  | 178.49(12)         |
| U1-O7  | 2.286(3)                | O2-U1-O3  | 91.10(11)          |
| As1-O5 | 1.670(3)                | O2-U1-O5  | 89.15(10)          |
| As1-O6 | 1.673(3)                | O2-U1-O6  | 90.22(10)          |
| As1-O7 | 1.670(3)                | O2-U1-O7  | 90.55(11)          |
| As1-O8 | 1.721(3)                | O3-U1-O5  | 86.41(10)          |
| O3-C5  | 1.279(5)                | O6-U1-O3  | 84.57(10)          |
| O4-C5  | 1.237(5)                | O6-U1-O5  | 170.94(10)         |
| O6-U1  | 2.252(3)                | O7-U1-O3  | 177.92(9)          |
| N1-C1  | 1.500(5)                | O7-U1-O5  | 94.88(10)          |
| N1-C2  | 1.503(5)                | O7-U1-O6  | 94.16(9)           |
| N1-C3  | 1.507(5)                | O5-As1-O6 | 107.38(13)         |
| N1-C4  | 1.502(5)                | O5-As1-O7 | 112.74(13)         |

|       |          |           |            |
|-------|----------|-----------|------------|
| C4-C5 | 1.520(5) | O5-As1-O8 | 105.10(13) |
|       |          | O6-As1-O7 | 113.21(13) |
|       |          | O6-As1-O8 | 109.48(13) |
|       |          | O7-As1-O8 | 108.59(14) |
|       |          | C5-O3-U1  | 126.5(2)   |
|       |          | As1-O5-U1 | 141.89(15) |
|       |          | As1-O6-U1 | 143.66(15) |
|       |          | As1-O7-U1 | 130.01(15) |
|       |          | C2-N1-C1  | 110.2(3)   |
|       |          | C3-N1-C1  | 109.2(3)   |
|       |          | C3-N1-C2  | 107.6(3)   |
|       |          | C4-N1-C1  | 111.2(3)   |
|       |          | C4-N1-C2  | 111.0(3)   |
|       |          | C4-N1-C3  | 107.6(3)   |
|       |          | N1-C4-C5  | 117.2(3)   |
|       |          | O3-C5-C4  | 111.8(3)   |
|       |          | O4-C5-O3  | 125.9(4)   |
|       |          | O4-C5-C4  | 122.4(3)   |

Symmetry codes:

(I) x-1, y, z; (II) -x+1, -y+1, -z+1; (III) x+1, y, z

**Table 8.** Anisotropic displacement parameters ( $\text{\AA}^2$ ) for **2**. The anisotropic displacement factor exponent takes the form:  $-2\pi^2[h^2 a^{*2}U^{11} + \dots + 2 h k a^* b^* U^{12}]$

|     | $U_{11}$    | $U_{22}$    | $U_{33}$    | $U_{23}$     | $U_{13}$    | $U_{12}$    |
|-----|-------------|-------------|-------------|--------------|-------------|-------------|
| U1  | 0.00739(7)  | 0.00879(8)  | 0.01242(8)  | 0.00057(5)   | 0.00108(5)  | 0.00030(5)  |
| As1 | 0.00737(17) | 0.01298(19) | 0.01144(18) | -0.00021(14) | 0.00097(13) | 0.00067(14) |
| O1  | 0.0172(14)  | 0.0132(14)  | 0.0194(14)  | 0.0025(11)   | 0.0005(11)  | 0.0009(11)  |
| O2  | 0.0139(13)  | 0.0124(14)  | 0.0176(13)  | 0.0016(11)   | 0.0007(10)  | 0.0001(11)  |
| O3  | 0.0196(15)  | 0.0151(14)  | 0.0170(14)  | -0.0018(11)  | 0.0034(11)  | 0.0028(11)  |
| O4  | 0.0209(15)  | 0.0214(15)  | 0.0237(15)  | -0.0068(12)  | 0.0092(12)  | -0.0023(13) |
| O5  | 0.0103(13)  | 0.0151(14)  | 0.0221(14)  | 0.0043(11)   | 0.0022(11)  | 0.0034(11)  |
| O6  | 0.0096(13)  | 0.0158(14)  | 0.0185(14)  | -0.0015(11)  | 0.0020(10)  | -0.0008(11) |
| O7  | 0.0185(14)  | 0.0145(13)  | 0.0134(13)  | 0.0021(11)   | 0.0011(10)  | -0.0010(11) |
| O8  | 0.0162(14)  | 0.0249(15)  | 0.0156(14)  | -0.0073(12)  | -0.0009(11) | 0.0002(12)  |
| N1  | 0.0168(16)  | 0.0148(16)  | 0.0101(14)  | -0.0011(13)  | 0.0029(12)  | 0.0042(13)  |
| C1  | 0.027(2)    | 0.019(2)    | 0.0162(19)  | -0.0032(16)  | -0.0026(17) | 0.0061(18)  |
| C2  | 0.037(3)    | 0.016(2)    | 0.016(2)    | 0.0071(16)   | 0.0017(18)  | 0.0070(18)  |
| C3  | 0.021(2)    | 0.027(2)    | 0.022(2)    | 0.0011(18)   | 0.0091(17)  | 0.0104(18)  |
| C4  | 0.0171(19)  | 0.014(2)    | 0.0158(18)  | -0.0015(15)  | 0.0032(15)  | -0.0001(16) |
| C5  | 0.018(2)    | 0.015(2)    | 0.0140(19)  | 0.0004(15)   | -0.0002(15) | 0.0050(16)  |
